# Supplementary material for: 1D aligned, n–p and n–n type ZnO heterojunction nanofibers for NO2 sensors: exploration of conduction mechanism using in situ impedance spectroscopy
Source: Royal Society of Chemistry journal article supplement (doi:10.1039/d2ma01095j), 2023-01-01
Supplement: d2ma01095j1.pdf [file d2ma01095j1.pdf]

## Supporting Information

# 1D Aligned, *n-p* and *n-n* type ZnO Heterojunction Nanofibers for NO<sub>2</sub> Sensors: Exploration of Conduction Mechanism using *In-situ* Impedance Spectroscopy

*Ramakrishnan Vishnuraj<sup>1</sup>, Mahaboobatcha Aleem<sup>1</sup>, Keerthi G Nair,<sup>1</sup> and Biji Pullithadathil<sup>1\*</sup>*

<sup>1</sup>Nanosensor laboratory, PSG Institute of Advanced Studies, Coimbatore – 641 004. India

\*Corresponding author Email: [bijuja123@yahoo.co.in](mailto:bijuja123@yahoo.co.in); [pbm@psgias.ac.in](mailto:pbm@psgias.ac.in)

### 1. Characterization Techniques:

The XRD patterns were acquired using Power X-ray diffractometer (Rigaku ULTIMA IV, Japan) using Cu K $\alpha$  radiation of wavelength 1.5418 Å at a scanning rate of 0.02°/sec in the 2 $\theta$  range of 20– 80°. Micro Raman spectra (Witech, 300 Alpha, Germany) of core-shell aligned *n-ZnO/p-Bi<sub>2</sub>O<sub>3</sub>* and *n-ZnO/n-In<sub>2</sub>O<sub>3</sub>* heterojunction nanofibers were obtained using  $\lambda = 532$  nm as an excitation light source with 1800 g/mm gratings. The structure and morphology of the aligned *n-ZnO/p-Bi<sub>2</sub>O<sub>3</sub>* and *n-ZnO/n-In<sub>2</sub>O<sub>3</sub>* heterojunction nanofibers were examined using High-Resolution Transmission Electron Microscopy (JEOL JEM-2010, Japan) and Scanning Electron Microscopy (ZEISS EVO 18, US), with in-built energy-dispersive X-ray spectrometer (Oxford Instruments, INCA, UK). UV-DRS absorption spectra were acquired using JASCO UV (V-750) spectrophotometer. X-ray photoelectron spectroscopy (XPS) measurements were performed on a Phoibos 100 MCD Energy Analyser using monochromatized Al K $\alpha$  excitation to analyze the elemental and chemical states of the materials. Brunauer-Emmett-Teller (BET) surface area analysis of samples was estimated by nitrogen adsorption-desorption isotherm (BELSORP-MAX, MicrotracBEL Corp, Japan).

### 2. Evaluation of gas sensor sensing properties:

The sensor device fabricated as inter-digitated array (IDA) electrode made of Au (~100 nm) with an inter finger gap of 80  $\mu$ m using planar DC magnetron sputtering on alumina substrates. Aligned, *n-ZnO/p-Bi<sub>2</sub>O<sub>3</sub>* and *n-ZnO/n-In<sub>2</sub>O<sub>3</sub>* heterojunction nanofibers were directly spun on

to the IDA transducer electrodes using parallel plate collector and thermal treated at 550°C. The sensing properties of these materials were assessed using a custom-built gas sensor test station consisting of a stainless-steel double-walled test chamber equipped with temperature-controlled hot stage (Eurotherm, 2420, U.K.), sensor holder, MFC controllers (Alicat, USA) and the Agilent digital multimeter (34401A, USA) for data acquisition connected to a PC interfaced with Labview. High pure N<sub>2</sub> gas was used as the carrier gas for NO<sub>2</sub> for specific concentration and the pressure was constantly maintained at 300sccm. Baratron 722B Absolute Capacitance Manometer (MKS Instruments, Singapore) was used to regulate the chamber pressure.

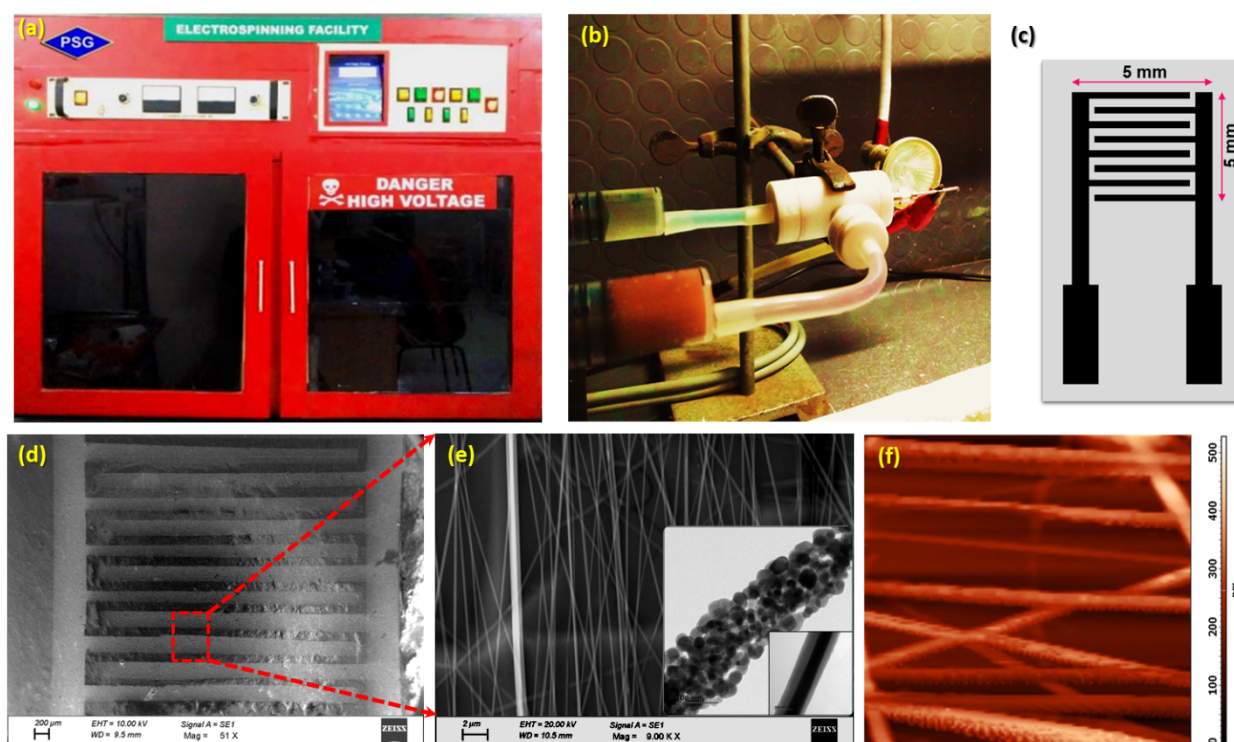

**Figure S1** (a) Photograph of home-built Electrospinning unit (b) Photographs of the fabricated co-axial spinneret components fixed in the independent dual syringe pump (c) design of IDA electrode (d-e) SEM image of electrospun aligned nanofibers deposited on Au sputtered IDA electrode and (f) AFM image of annealed heterojunction nanofibers.

### 3. Electrospinning of ZnO nanofibers:

In this typical procedure, 8 wt% of PVA was dissolved in 29 mL of ultrapure water (Millipore Academic, Resistivity, 18.2 MΩ.cm) and kept for stirring. After formation of viscous solution 0.8 g of Zinc acetate was added slowly until the homogeneity appears. Then

the solution was finally stirred for 3 hours after the addition of 1 mL ethanol. A clear solution thus obtained was then subjected to electrospinning at a voltage, 25 kV with a feed rate of 0.2 mL/h. Thus, obtained ZnO/PVA nanofibers were annealed in a tubular furnace at 550°C for 3 hours to obtain crystalline ZnO nanofibers.

#### 4. Optical Band gap calculation using UV–visible diffuses reflectance spectroscopy (DRS):

The band gap energy of the samples was measured by the extrapolation of the linear portion of the graph between the modified Kubelka-Munk function  $[F(R) \cdot hv]^2$  versus photon energy ( $hv$ ) shown in the inset **Figure S2(b)**.

$$F_{KM} = \frac{(1 - R)^2}{2R} \quad (1)$$

The band gaps of the pristine ZnO,  $n$ -ZnO/ $p$ -Bi<sub>2</sub>O<sub>3</sub> and  $n$ -ZnO/ $n$ -In<sub>2</sub>O<sub>3</sub> heterojunction nanofibers were calculated to be 3.27, 3.14 and 3.20 eV respectively. The considerable change observed in the band gaps is due to the interfacial electron transfer between ZnO and respective  $p$ -Bi<sub>2</sub>O<sub>3</sub> /  $n$ -In<sub>2</sub>O<sub>3</sub> nanoclusters as shell layer.

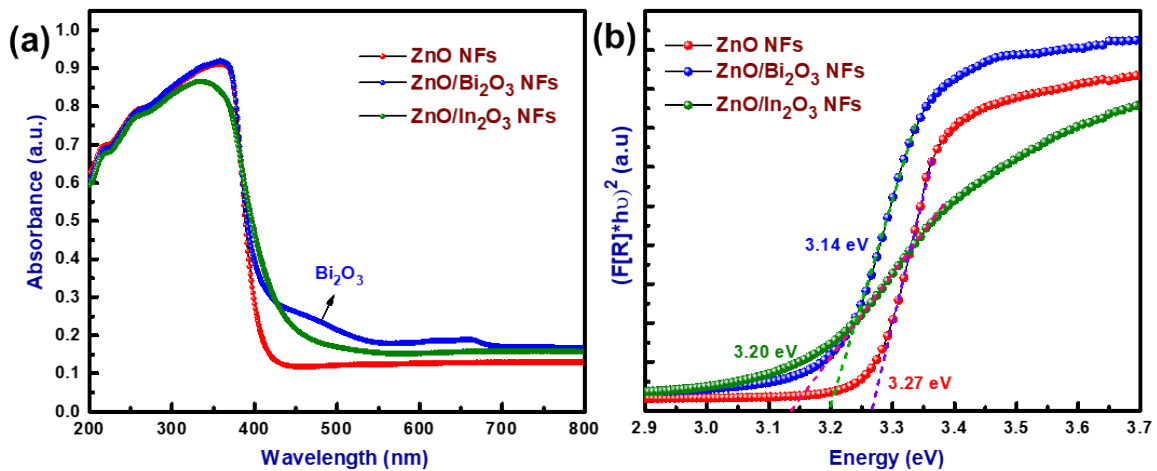

**Figure S2(a)** UV–Vis DRS spectra of pristine ZnO,  $n$ -ZnO/ $p$ -Bi<sub>2</sub>O<sub>3</sub> and  $n$ -ZnO/ $n$ -In<sub>2</sub>O<sub>3</sub> heterojunction nanofibers. **(b)** Kubelka-Munk function versus energy plots.

## 5. BET analysis:

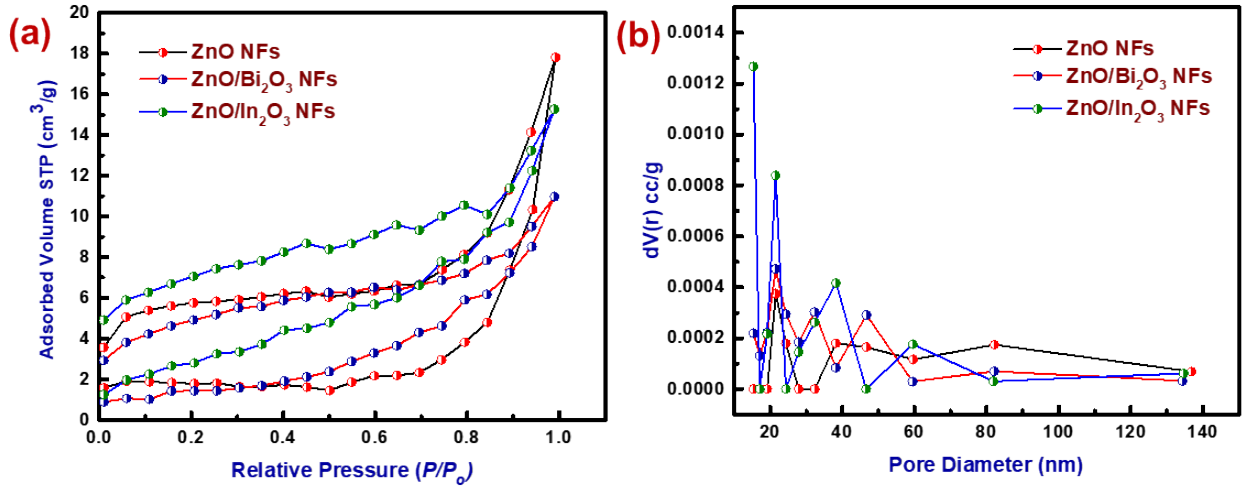

**Figure S3** (a) Typical nitrogen adsorption–desorption isotherms of porous ZnO, *n*-ZnO/*p*-Bi<sub>2</sub>O<sub>3</sub> and *n*-ZnO/*n*-In<sub>2</sub>O<sub>3</sub> heterojunction nanofibers and (b) corresponding pore size distribution

**Table S1.** Parameters estimated from BET analysis of porous ZnO, *n*-ZnO/*p*-Bi<sub>2</sub>O<sub>3</sub> and *n*-ZnO/*n*-In<sub>2</sub>O<sub>3</sub> heterojunction nanofibers:

| Materials                                                    | Surface area (m <sup>2</sup> /g) | Pore volume (cm <sup>3</sup> /g) | Pore size (nm) |
|--------------------------------------------------------------|----------------------------------|----------------------------------|----------------|
| ZnO nanofibers                                               | 5.695                            | 6.6324                           | 2.1547         |
| ZnO/Bi <sub>2</sub> O <sub>3</sub> heterojunction nanofibers | 7.302                            | 2.8475                           | 2.0511         |
| ZnO/In <sub>2</sub> O <sub>3</sub> heterojunction nanofibers | 16.012                           | 3.5247                           | 1.5355         |

**Table: S2** Comparison of NO<sub>2</sub> gas sensing results:

| Conc. of NO <sub>2</sub><br>(ppm) | ZnO nanofibers          |                           | ZnO/Bi <sub>2</sub> O <sub>3</sub> nanofibers |                           | ZnO/In <sub>2</sub> O <sub>3</sub> nanofibers |                           |
|-----------------------------------|-------------------------|---------------------------|-----------------------------------------------|---------------------------|-----------------------------------------------|---------------------------|
|                                   | S <sub>Response</sub> % | T <sub>Response</sub> (s) | S <sub>Response</sub> %                       | T <sub>Response</sub> (s) | S <sub>Response</sub> %                       | T <sub>Response</sub> (s) |
| 0.5                               | 31                      | 5                         | 365                                           | 8.0                       | 843                                           | 5.6                       |
| 1                                 | 82                      | 5                         | 820                                           | 7.8                       | 1243                                          | 4.6                       |
| 1.5                               | 193                     | 7                         | 1210                                          | 6.0                       | 1538                                          | 5.2                       |
| 2                                 | 407                     | 9                         | 1927                                          | 5.0                       | 1609                                          | 4.6                       |
| 2.5                               | 479                     | 9                         | 2551                                          | 5.3                       | 2164                                          | 3.4                       |
| 3                                 | 548                     | 10                        | 2732                                          | 5.2                       | 2512                                          | 4.8                       |

## 6. Cross Selectivity Studies:

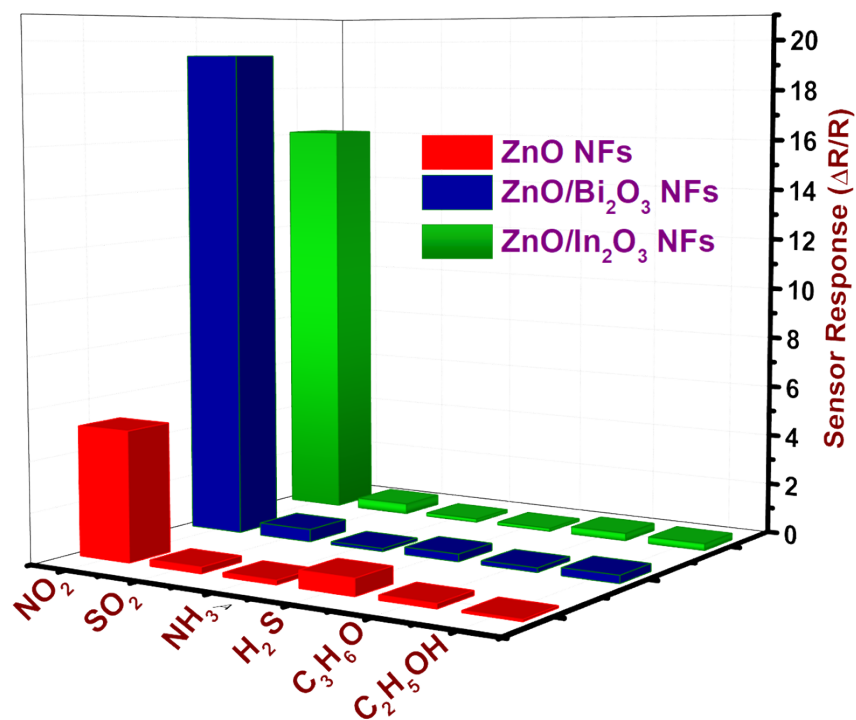

**Figure S4** Cross selectivity studies of pristine ZnO nanofibers, aligned  $n$ -ZnO/ $p$ -Bi<sub>2</sub>O<sub>3</sub> and  $n$ -ZnO/ $n$ -In<sub>2</sub>O<sub>3</sub> heterojunction nanofibers.

### 7. Relative Humidity Interference Studies:

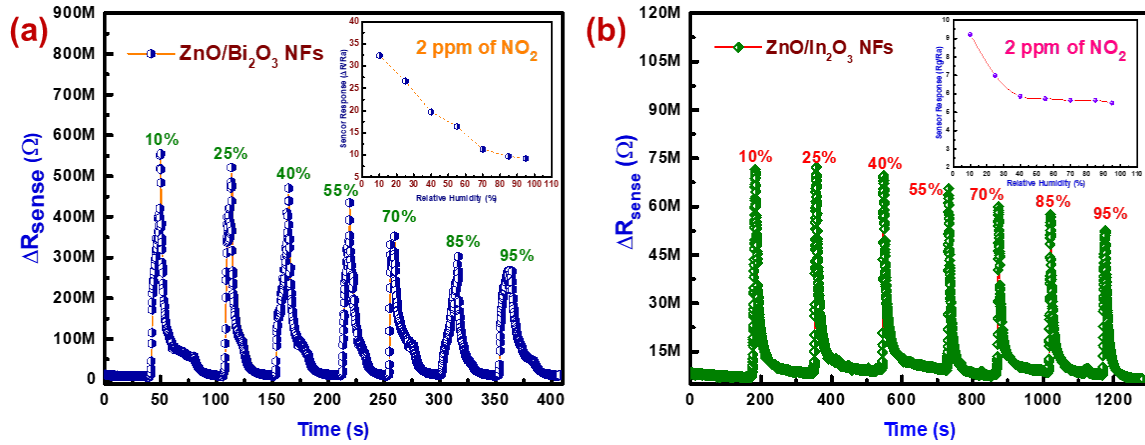

**Figure S5.** Relative humidity interference studies of (a) aligned  $n$ -ZnO/ $p$ -Bi<sub>2</sub>O<sub>3</sub> heterojunction nanofibers and (b) aligned  $n$ -ZnO/ $n$ -In<sub>2</sub>O<sub>3</sub> heterojunction nanofibers.

### 8. Repeatability and Stability:

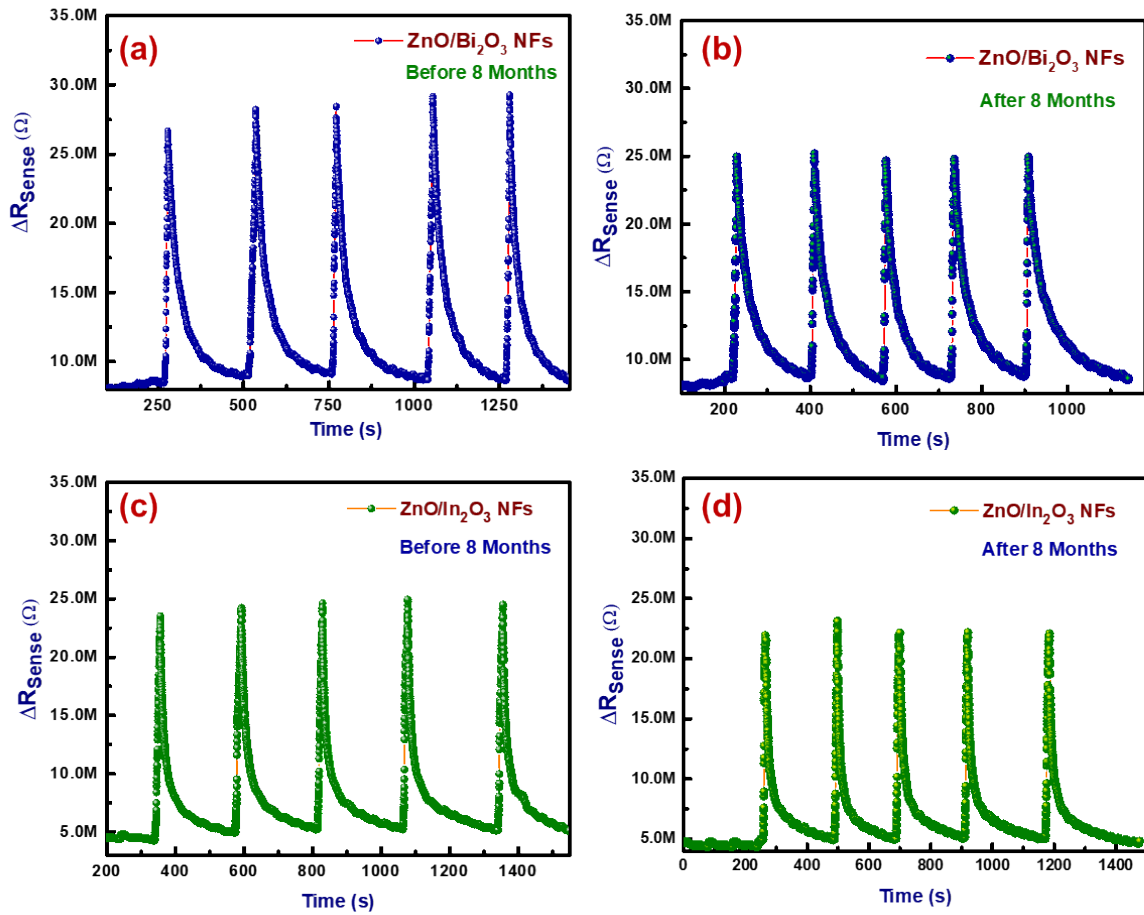

**Figure S6.** Repeatability and Stability studies of aligned *n*-ZnO/*p*-Bi<sub>2</sub>O<sub>3</sub> heterojunction nanofibers (a) before 10 months and (b) after 10 months and aligned *n*-ZnO/*n*-In<sub>2</sub>O<sub>3</sub> heterojunction nanofibers (c) before 10 months and (d) after 10 months.

## 9. AC-impedance Spectroscopic analysis:

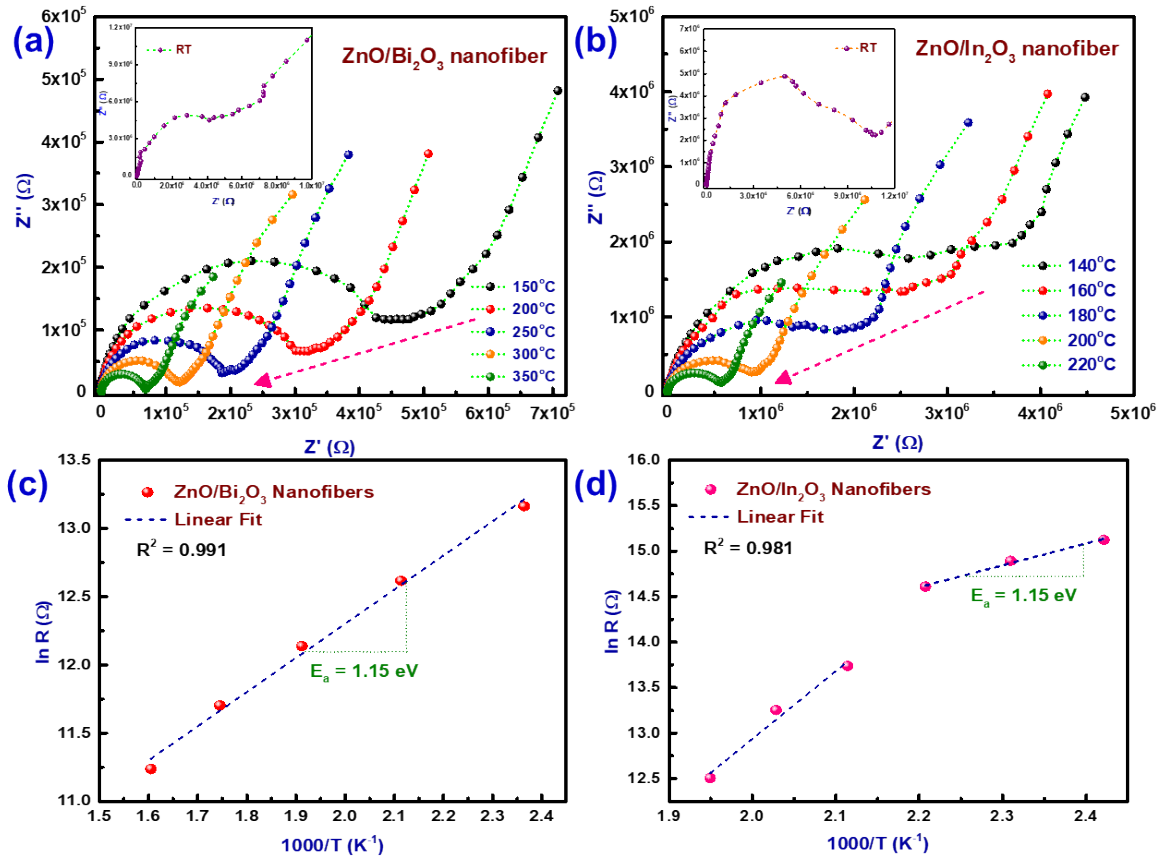

**Figure S7** (a-b) Nyquist plot of the complex impedance at different temperatures for *n*-ZnO/*p*-Bi<sub>2</sub>O<sub>3</sub> and *n*-ZnO/*n*-In<sub>2</sub>O<sub>3</sub> heterojunction nanofibers, (c-d) Arrhenius plot of *n*-ZnO/*p*-Bi<sub>2</sub>O<sub>3</sub> and *n*-ZnO/*n*-In<sub>2</sub>O<sub>3</sub> heterojunction nanofibers.

| Conditions | <i>n</i> -ZnO/ <i>p</i> -Bi <sub>2</sub> O <sub>3</sub> heterojunction NFs |                    |                     |                     | <i>n</i> -ZnO/ <i>n</i> -In <sub>2</sub> O <sub>3</sub> heterojunction NFs |                    |                     |                     |
|------------|----------------------------------------------------------------------------|--------------------|---------------------|---------------------|----------------------------------------------------------------------------|--------------------|---------------------|---------------------|
|            | Z <sub>0</sub> (Ω)                                                         | Z <sub>G</sub> (Ω) | Z <sub>GB</sub> (Ω) | C <sub>b</sub> (nF) | Z <sub>0</sub> (Ω)                                                         | Z <sub>G</sub> (Ω) | Z <sub>GB</sub> (Ω) | C <sub>b</sub> (nF) |



|                         |       |         |         |      |       |         |         |      |
|-------------------------|-------|---------|---------|------|-------|---------|---------|------|
| Room Temperature        | 89.78 | 9.725e6 | 63.72e6 | 8.73 | 6.766 | 9.748e6 | 292.7   | 8.91 |
| Operating temperature   | 24.69 | 141e3   | 254e3   | 8.69 | 34.89 | 344 e3  | 536 e3  | 8.89 |
| 0.5 ppm NO <sub>2</sub> | 25.76 | 196     | 116e3   | 7.10 | 102.9 | 450     | 656 e3  | 6.47 |
| 2 ppm NO <sub>2</sub>   | 106.2 | 201e3   | 252e3   | 6.83 | 69.1  | 229e3   | 2.702e6 | 5.38 |

**Table: S3 Fitted parameters attained for ZnO/Bi<sub>2</sub>O<sub>3</sub> and ZnO/In<sub>2</sub>O<sub>3</sub> HNFs:**

**Table: S4 Calculated parameters from the impedance analysis:**

| Conditions              | Carrier Density ( $n_s$ ) $10^{19} \text{ cm}^{-2}$ |                                        | Depletion Width (nm)                   |                                        |
|-------------------------|-----------------------------------------------------|----------------------------------------|----------------------------------------|----------------------------------------|
|                         | $n\text{-ZnO}/p\text{-Bi}_2\text{O}_3$              | $n\text{-ZnO}/n\text{-In}_2\text{O}_3$ | $n\text{-ZnO}/p\text{-Bi}_2\text{O}_3$ | $n\text{-ZnO}/n\text{-In}_2\text{O}_3$ |
| Room Temperature        | 1.64                                                | 1.51                                   | 2.15                                   | 2.11                                   |
| Operating temperature   | 1.63                                                | 1.44                                   | 2.16                                   | 2.12                                   |
| 0.5 ppm NO <sub>2</sub> | 1.08                                                | 0.77                                   | 2.64                                   | 2.89                                   |
| 2 ppm NO <sub>2</sub>   | 0.98                                                | 0.53                                   | 2.76                                   | 3.48                                   |
